# Supplementary material
Source: Springer Nature journal article supplement (https://www.springermedizin.de/resource/supplementary/12885_2014_4682_MOESM3_ESM.pdf/9467032)

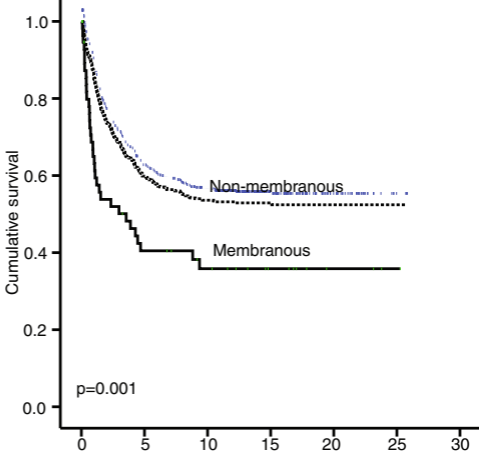

**Patients at risk**

Non-membranous  
Membranous

Years from diagnosis

|     |     |     |     |    |   |
|-----|-----|-----|-----|----|---|
| 717 | 367 | 266 | 109 | 34 | 3 |
| 63  | 21  | 15  | 9   | 3  | 1 |

Supplement: MOESM3 [file 9467032]
